# Supplementary material
Source: publisher figshare collection journal article supplement (https://acs.figshare.com/ndownloader/files/16266476)
Supplement: Supplementary file 1 [file 16266476]

## *Supporting Information*

*for*

### **Electrochemical detection of gallic acid-capped gold nanoparticles using multi-walled carbon nanotube-reduced graphene oxide nanocomposite electrode**

*Hashwin V.S. Ganesh, Bhargav R. Patel, Hamid Fini, Ari M. Chow, Kagan Kerman\**

Department of Physical and Environmental Sciences, University of Toronto Scarborough,

1265 Military Trail, Toronto, ON, M1C 1A4, Canada

\* E-mail: [kagan.kerman@utoronto.ca](mailto:kagan.kerman@utoronto.ca) Tel: +1 416 287 7249

#### **TABLE OF CONTENTS**

|                                                                                                                                          |                 |
|------------------------------------------------------------------------------------------------------------------------------------------|-----------------|
| <b>Gallic acid-capped Au nanoparticle (GA-AuNP) colloidal solutions.....</b>                                                             | <b>S1</b>       |
| <b>Plot of cathodic peak potential vs pH &amp; plot of cathodic peak current vs pH.....</b>                                              | <b>S2</b>       |
| <b>Differential pulse voltammograms of citrate-capped AuNPs (alone) and gallic acid (alone) and blank PBS at a bare electrode.....</b>   | <b>S3A</b>      |
| <b>Differential pulse voltammograms of GA-AuNPs at bare and nanocomposite-modified electrodes.....</b>                                   | <b>S3B</b>      |
| <b>Differential pulse voltammograms of GA-AuNPs and GA (alone) at nanocomposite-modified electrodes.....</b>                             | <b>S4</b>       |
| <b>Equivalent circuit elements following fitting of EIS data obtained from bare GCEs and modified electrodes as shown in Fig. 5.....</b> | <b>Table S1</b> |
| <b>Bode-Bode plots of the modified electrodes.....</b>                                                                                   | <b>S5</b>       |
| <b>Differential pulse voltammograms for repeatability studies.....</b>                                                                   | <b>S6</b>       |

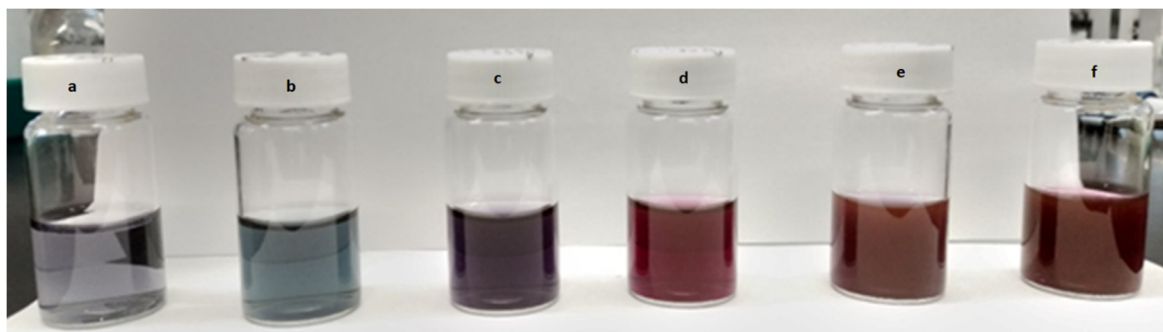

**Figure S1** – Photograph showing the colloidal solutions of GA-AuNPs synthesized using varying concentrations of  $\text{HAuCl}_4 \cdot 3\text{H}_2\text{O}$  (samples a-f), a)  $167 \mu\text{M}$  b)  $250 \mu\text{M}$  c)  $333 \mu\text{M}$  d)  $375 \mu\text{M}$  e)  $500 \mu\text{M}$  f)  $537 \mu\text{M}$  during reduction reaction with GA. Colloidal solutions in various colours were obtained depending on the size of the GA-AuNPs produced during the synthesis reaction.

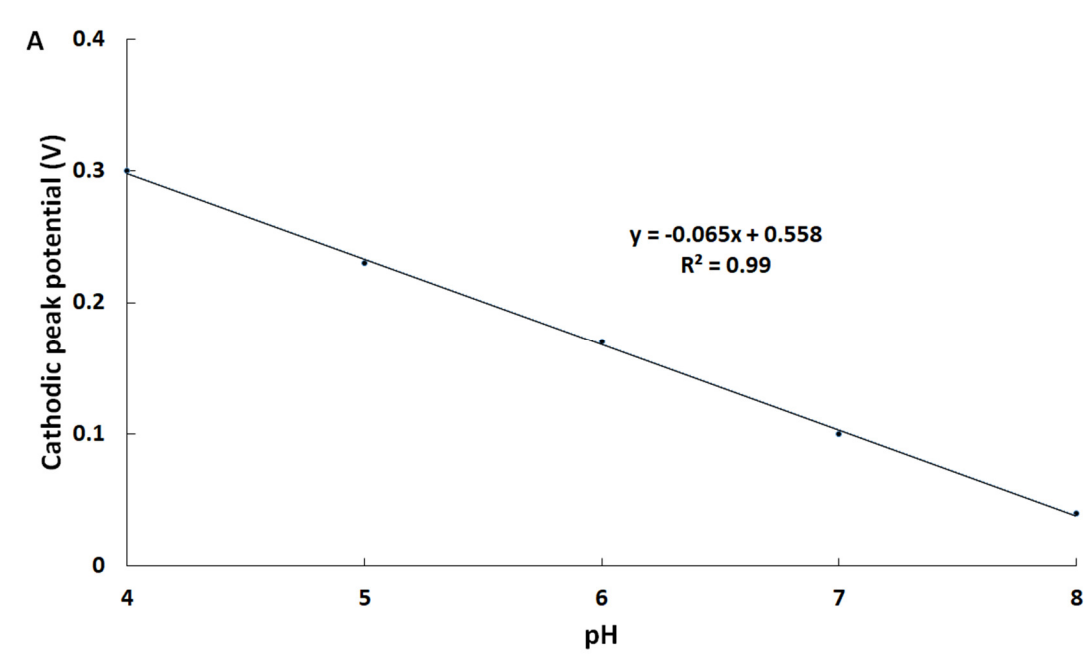

**Figure S2A.** Plot of cathodic peak potential vs pH for the detection of GA-AuNPs ( $85 \text{ pM}$ ) at MWCNT-rGO-GCE. DPV measurements were performed in  $0.1 \text{ M}$  PBS at an amplitude of  $25 \text{ mV}$  and a step potential of  $5 \text{ mV}$ .

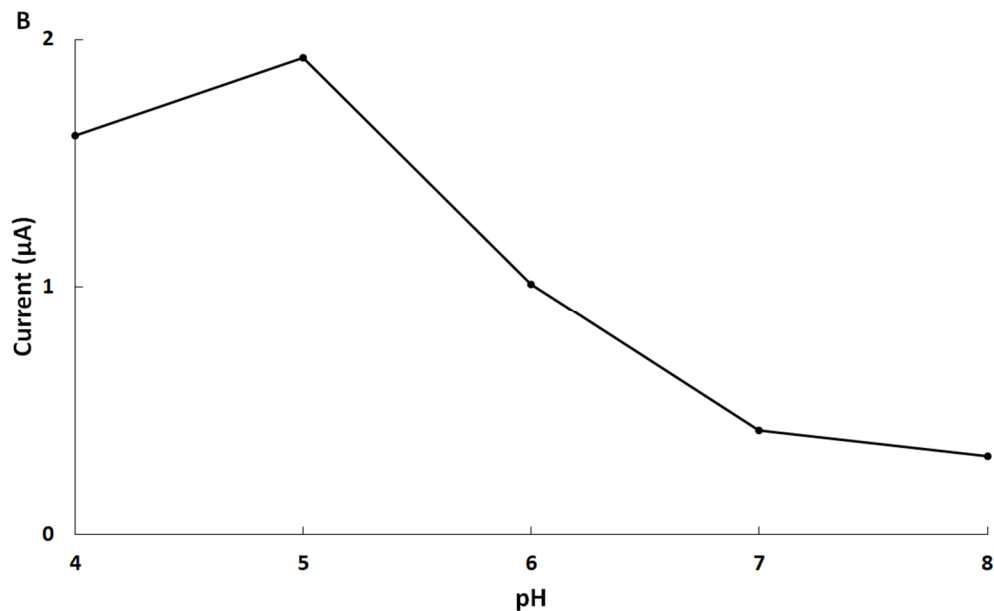

**Figure S2B.** Plot of cathodic peak current vs pH for the detection of GA-AuNPs (85 pM) at MWCNT-rGO-GCE. DPV measurements were performed in 0.1 M PBS at an amplitude of 25 mV and a step potential of 5 mV.

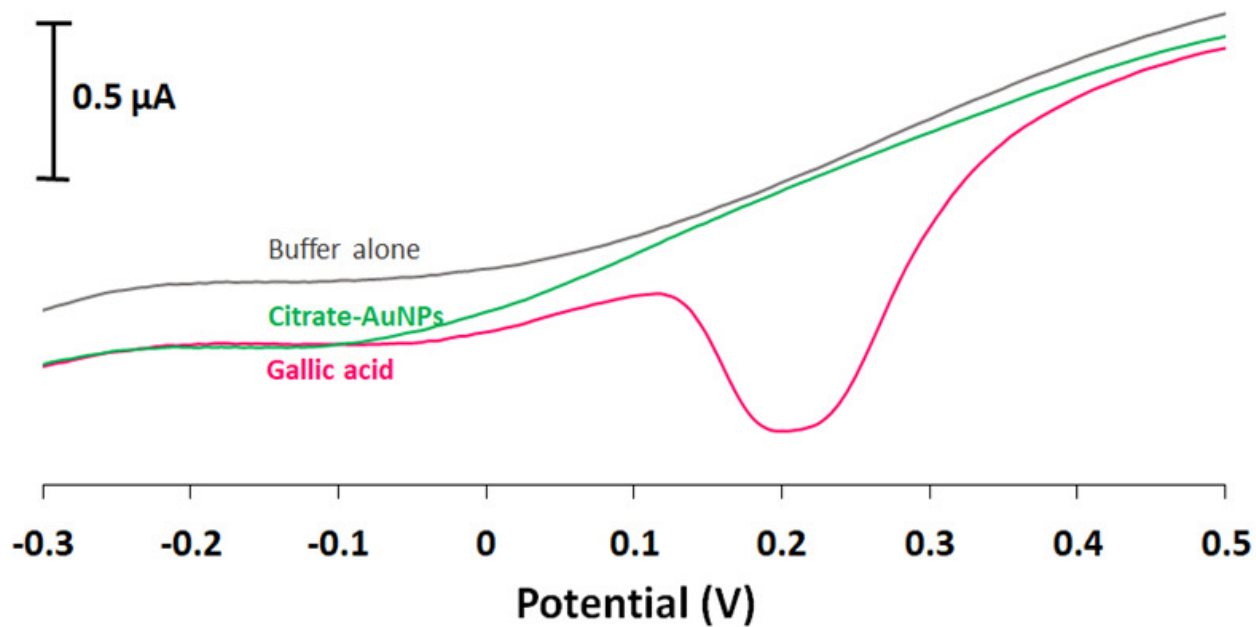

**Figure S3A.** Differential pulse voltammograms of 85 pM of citrate-AuNPs (green trace) and 300 μM gallic acid (pink trace) at bare GCE. DPV measurements were performed in 0.1 M PBS (pH 5) at an amplitude of 25 mV and a step potential of 5 mV from 0.5 V to -0.3 V (vs. Ag/AgCl).

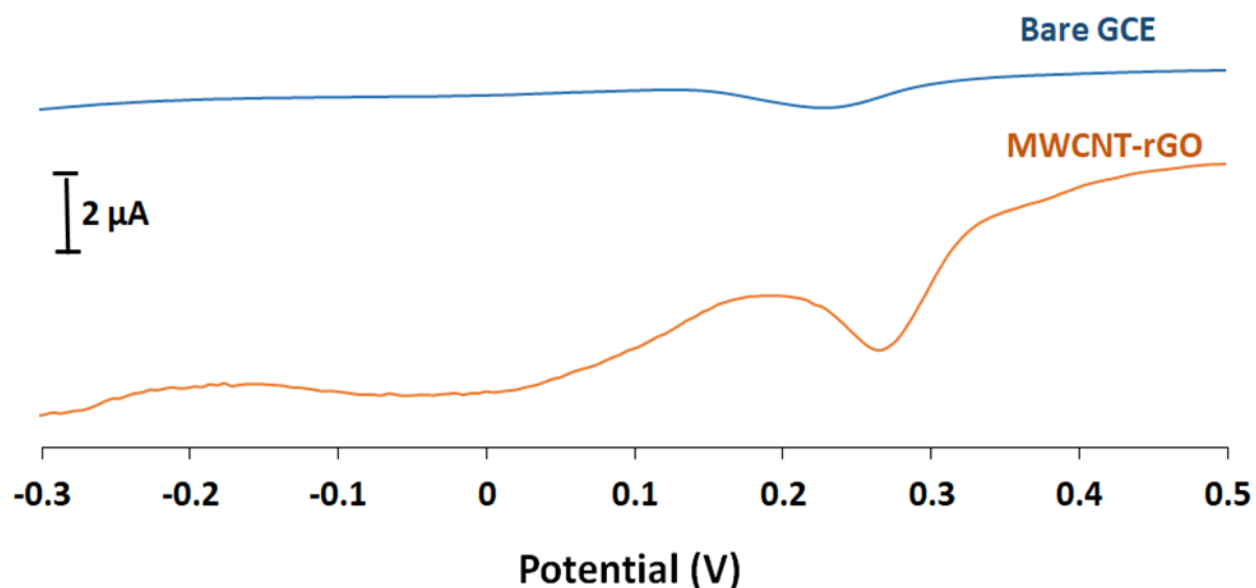

**Figure S3B.** Differential pulse voltammograms of 85 pM GA-AuNPs at bare GCE (blue) and MWCNT-rGO modified GCE (orange). DPV measurements were performed in 0.1 M PBS (pH 5) at an amplitude of 25 mV and a step potential of 5 mV from 0.5 V to -0.3 V (vs. Ag/AgCl).

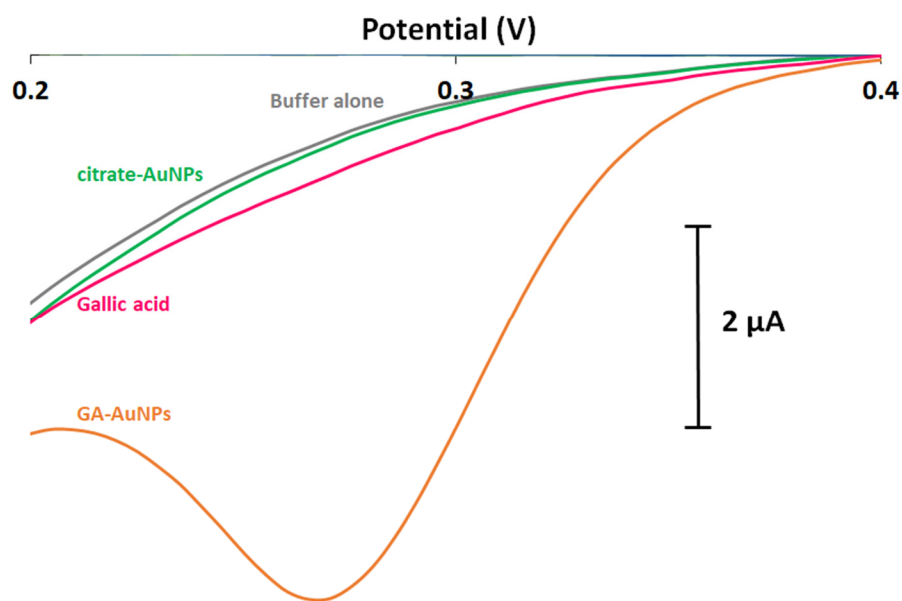

**Figure S4.** Differential pulse voltammograms of 85 pM GA-AuNPs (orange trace), 85 nM gallic acid (pink trace) and 85 pM citrate-AuNPs (green trace) at MWCNT-rGO modified GCE. DPV Measurements were carried out in 0.1 M PBS (pH 5) at an amplitude of 25 mV and a step potential of 5 mV from 0.4 V to 0.2 V (vs. Ag/AgCl).

**Table S1. Equivalent circuit elements following fitting of EIS data obtained from bare GCEs and modified electrodes as shown in Fig. 5.**

|                  | $R_s$<br>( $\Omega$ ) | $R1$<br>( $\Omega$ ) | $R2$<br>( $\Omega$ ) | $Q_{dl}$<br>( $\mu\text{Mho}\cdot\text{s}^N$ ) | N     | $Q1$<br>( $\mu\text{Mho}\cdot\text{s}^N$ ) | N     | $Q2$<br>( $\mu\text{Mho}\cdot\text{s}^N$ ) | N     |
|------------------|-----------------------|----------------------|----------------------|------------------------------------------------|-------|--------------------------------------------|-------|--------------------------------------------|-------|
| <b>Bare GCE</b>  | 158                   | 573                  | n.d.                 | 10.5                                           | 0.696 | 42.7                                       | 0.407 | n.d.                                       | n.d.  |
| <b>rGO</b>       | 119                   | 24600                | 1720                 | 8.16                                           | 0.705 | 635                                        | 1     | 60.5                                       | 0.784 |
| <b>MWCNT</b>     | 121                   | 10800                | 2550                 | 5.36                                           | 0.782 | 28.9                                       | 0.539 | 9.09                                       | 1.03  |
| <b>MWCNT+rGO</b> | 108                   | 51.8                 | n.d.                 | 111                                            | 0.921 | 130                                        | 0.692 | n.d.                                       | n.d.  |

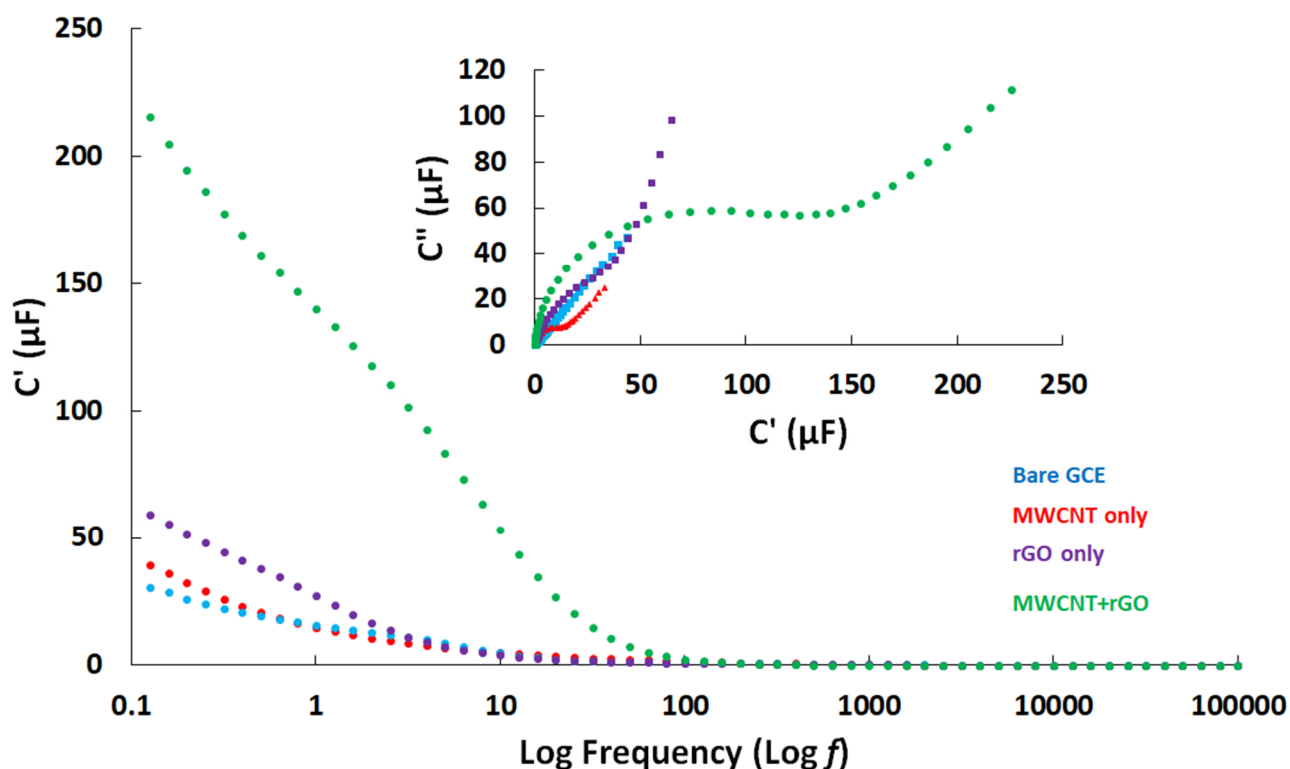

**Figure S5.** Bode-Bode plots of A) Bare GCE, B) rGO-modified GCE, C) MWCNT-modified GCE and D) MWCNT-rGO-modified GCE. Inset shows the plot of  $C'$  vs  $C''$  for each of the electrode modifications. Equivalent circuits for each electrode modification are provided in Figure. 5 in the main text.

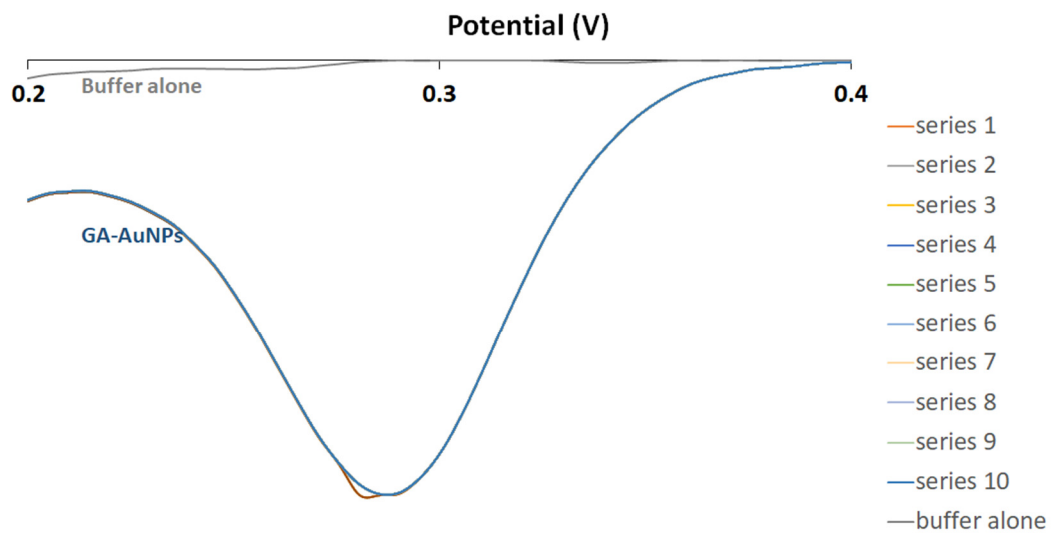

**Figure S6.** Differential pulse voltammograms of MWCNT-rGO-modified GCEs in 0.1 M PBS (pH 5) for repetitive measurements ( $n = 10$ ) of a solution containing 164 pM GA-AuNPs.
